# Supplementary material for: Impact of a Formative Program on Transgender Healthcare for Nursing Students and Health Professionals. Quasi-Experimental Intervention Study
Source: MDPI journal article supplement (doi:10.3390/ijerph16173205), 2019-09-02
Supplement: s1 [file s1]

## **CUESTIONARIO DE CONOCIMIENTOS SOBRE DIVERSIDAD DE GÉNERO (KQaT) (SPANISH VERSION)**

### **1. Para reconocer la transexualidad en la infancia las familias deben:**

- a. Recurrir a un psiquiatra que diagnostique la transexualidad
- b. Recurrir a un psicólogo que emita un informe
- c. Escuchar al menor y respetar su identidad, sin censurar
- d. Corregir toda expresión de género (juegos, ropa, amistades...) que vaya en contra de su sexo registral

### **2. Se entiende por sexo registral:**

- a. El que se establece a partir de las características fisiológicas de una persona.
- b. El que se indica en la partida de nacimiento según figura en el registro civil.
- c. El que la persona comunica libremente ante la sociedad
- d. El que se indica mediante certificado médico.

### **3. En la ley en vigor 3/ 2007, del 15 de marzo, reguladora de la rectificación registral en cuestión relativa al sexo de las personas:**

- a. No se contempla la transexualidad en menores.
- b. No se contempla la transexualidad en menores ni en residentes extranjeros.
- c. No se permite el cambio de sexo sin operación genital
- d. Las personas pueden solicitar la corrección de la mención registral de sexo sin ningún requisito médico.

### **4. La patologización de la transexualidad conlleva una serie de consecuencias, como son:**

- a. Violaciones de los derechos humanos
- b. Anomalías o malformaciones
- c. Limitación importante de derechos de acceso a los recursos públicos
- d. Todas son correctas

### **5. ¿El activismo por la despatologización de la intersexualidad busca fundamentalmente?**

- a. Defender el derecho a la diversidad corporal
- b. Defender el derecho a la diversidad de género
- c. Defender el derecho a la diversidad sexual
- d. Defender el derecho a la diversidad cultural

### **6. Los principios de Yogyakarta...**

- a. Enuncian la aplicación de la normativa de la ONU sobre derechos de las personas transexuales, en el ámbito de los países asiáticos y del pacífico
- b. Son un método de enunciar los derechos de las personas intersexuales
- c. Son unas conclusiones extraídas del conflicto de la cafetería Comptom's, inicio de la revuelta por los derechos de los transexuales
- d. Son la aplicación de la carta de derechos humanos a la diversidad sexual, corporal y de género

### **7. El protocolo para el acompañamiento al alumnado trans y la atención a la diversidad de género en los centros educativos de Canarias se pone en marcha:**

- a. Únicamente si la situación es comunicada por las progenitoras, los progenitores o representantes legales del alumno o alumna trans al centro educativo.
- b. Si es comunicada por cualquier miembro de la comunidad educativa.
- c. Exclusivamente si es comunicado por el propio alumnado trans, para preservar su intimidad.
- d. Si es comunicada la Inspección Educativa y esta da la orden de aplicar el protocolo.

- 
- 8. Una vez activado el protocolo para el acompañamiento al alumnado trans y la atención a la diversidad de género en los centros educativos de Canarias el centro:**
- Permitirá el acceso a aseos y vestuarios acordes a su identidad de género.
  - Podrá obligar al alumnado a vestir con el "uniforme escolar" propuesto por el Consejo Escolar hasta que no tenga modificado su nombre en el Registro Civil.
  - Pondrá obligatoriamente las horas de la asignatura de Educación Física a última hora del día en los cursos con alumnado trans.
  - Acondicionará un nuevo aseo diferente a los dos existentes, pudiendo ser construido de forma anexa al edificio principal si es necesario, para uso exclusivo al alumnado trans.
- 9. Dentro de las actuaciones de sensibilización, formación y adecuación curricular para la inclusión de la diversidad sexual y de género, los centros educativos podrán realizar actividades complementarias y/o extraescolares aprovechando fechas conmemorativas como pueden ser:**
- 31 de marzo: "Día Internacional de la Visibilidad Trans".
  - 24 de mayo: "Día Internacional contra la Lesbofobia, Homofobia, Transfobia, Bifobia e Interfobia".
  - 18 de junio: "Día del Orgullo Lésbico, Homosexual, Trans, Intersexual, e Identidades No Binarias".
  - 24 de octubre: "Día de la Visibilidad Intersex".
- 10. El tratamiento hormonal se podrá iniciar:**
- Antes de desarrollo de los caracteres sexuales secundarios
  - Siempre debe existir experiencia de vida real documentada
  - Cuando la persona transexual decida operarse
  - Todas son falsas
- 11. Los efectos del tratamiento hormonal, es falso que:**
- En su mayoría son reversibles
  - En transexuales de hombre a mujer hay respuesta parcial en la eliminación del vello facial
  - En transexuales de mujer a hombre, el tamaño mamario disminuye
  - Las primeras modificaciones corporales aparecen generalmente antes de los 3 meses
- 12. Como efectos adversos del tratamiento hormonal destacan:**
- El tromboembolismo venoso en caso de terapia hormonal androgénica
  - Resistencia a la acción de la insulina con estrógenos
  - Con el uso de estrógenos, el cáncer de mama
  - Con el uso de testosterona, riesgo de moderado a alto de migraña intensa
- 13. Sobre el tratamiento quirúrgico de reasignación:**
- Precisa de un año de tratamiento hormonal continuo, salvo que existan contraindicación médica para dicho tratamiento
  - Debe conocer los distintos tipos de intervención, costes, duración de la hospitalización, posibles complicaciones y rehabilitación tras la cirugía
  - Debe firmar el consentimiento informado
  - Todas son correctas
- 14. Para efectuar un cambio de nombre en el Registro, es necesario:**
- La existencia previa de un trastorno de personalidad diagnosticado
  - Declaración jurada del sexo reclamado por parte del solicitante
  - Es condición necesaria la existencia previa de cirugía de reasignación sexual
  - La existencia previa de un diagnóstico de disforia de género

**15. Una vez efectuado el cambio de nombre registral, este hecho comportará:**

- a. La obligación de tramitación de un nuevo DNI acorde a la inscripción registral efectuada, con diferente número de DNI.
- b. No comporta obligación de tramitación de nuevo DNI, basta con la mera notificación
- c. La obligación de tramitación de un nuevo DNI, conservando el número anterior, acorde con la inscripción registral efectuada
- d. La notificación desde el Registro correspondiente, a todos los organismos, con la nueva inscripción registral detallada

**16. Ley 2/2014, de 8 de julio, integral para la no discriminación por motivos de identidad de género y reconocimiento de los derechos de las personas transexuales, es una Ley de aplicación en la Comunidad Autónoma de:**

- a. Madrid
- b. Cataluña
- c. Andalucía
- d. Es de aplicación a nivel nacional

**17. El sexo biológico es:**

- a. Aquel sexo con el que se nace y que viene determinado por los genitales.
- b. El sexo de nacimiento y que viene determinado genéticamente.
- c. El sexo de nacimiento que viene dado por los genes siendo masculino o femenino.
- d. El sexo de nacimiento que viene determinado por los genes siendo macho o hembra.

**18. El sentimiento de pertenencia a un género u otro es conocido como:**

- a. Pansexualidad.
- b. Transgenerismo.
- c. Identidad.
- d. Homosexualidad.

**19. Si una persona a la que se le asignó un determinado sexo al nacimiento tiene un sentimiento de pertenencia al otro género. Hablamos de:**

- a. Pansexualidad.
- b. Cisexualidad.
- c. Travestismo.
- d. Transexualidad.

**20. El sentimiento de pertenencia a un determinado sexo:**

- a. Sexo sentido.
- b. Género sentido.
- c. Sexo perteneciente.
- d. Género pertinente.

**21. ¿Qué es la masculinización del tórax?**

- a. Ese procedimiento quirúrgico aún no está implantado en España, sí se hace en el resto de la Unión Europea.
- b. Es un procedimiento quirúrgico que se le realiza a las mujeres tras padecer cáncer de mama, y que resulta en un pecho de apariencia masculina.
- c. Es un procedimiento quirúrgico consistente en una mastectomía bilateral subcutánea con extirpación del tejido mamario, y reducción del tamaño de las areolas y los pezones conforme al patrón masculino.

- d. Es un procedimiento quirúrgico que se basa en una mastectomía bilateral subcutánea para reducir el volumen del pecho, dejando tejido mamario y cicatriz visible y en la que la mayoría de veces no es necesario usar un injerto areola-pezón.

**22. ¿Qué entiendes por un hombre transexual?**

- a. Una persona a la que se le ha asignado el sexo masculino al nacer y se siente mujer.
- b. Una chica que quiere ser chico.
- c. Una persona a la que se le ha asignado el sexo masculino al nacer y se opera para ser mujer.
- d. Una persona a la que se le ha asignado el sexo femenino al nacer y se siente hombre.

**23. El cambio o adecuación de caracteres secundarios hacia el sexo sentido se conoce como:**

- a. Test de vida real.
- b. Tránsito.
- c. Transgenerismo.
- d. Expresión del género.

**24. ¿Cuándo un niño tiene conciencia sobre su género?**

- a. 3-4 años.
- b. 5-6 años.
- c. 7-11 años.
- d. 9-14 años.

**25. Señale la opción que considere correcta:**

- a. Todas las comunidades autónomas siguen un protocolo de atención sanitaria a personas trans establecido por la OMS mediante guías de recomendación de práctica clínica.
- b. Únicamente algunas comunidades tienen protocolos de atención sanitaria a personas trans, entre ellas Canarias.
- c. Como es algo de nueva emergencia en la sociedad, aún no existe un protocolo de actuación.
- d. Únicamente existe en Canarias un protocolo de acompañamiento al alumnado trans, en los centros escolares.

**26. Si una persona nace con un sexo biológico de mujer, pero se identifica con el género masculino y se siente atraído sexualmente por otras mujeres hablamos de:**

- a. Una mujer homosexual.
- b. Una mujer heterosexual.
- c. Un hombre homosexual.
- d. Un hombre heterosexual.

**27. ¿Hay que someter a cirugías a los bebés intersexuales?**

- a. No, nunca, estos procedimientos son irreversibles y da como resultado un cuerpo desprovisto de sensibilidad sexual en la mayoría de los casos.
- b. Sí, siempre que sea necesario una vez valorados por cirugía pediátrica.
- c. Depende de lo que decidan los padres.
- d. Depende de lo que opinen los médicos y los padres, una vez llegue el resultado del cariotipo.

**28. ¿Es lo mismo ser intersexual que ser transexual?**

- a. Sí, depende de los gustos sexuales.
- b. La intersexualidad es una forma más de diversidad de género.
- c. La intersexualidad no es una parte de la diversidad de género, porque la intersexualidad no es acerca del género, ni tiene que ver con una transición.
- d. Según el tamaño de los genitales con los que se nazca será una cosa o la otra

**29. ¿Qué crees que es una persona cissexual?**

- a. Una persona a la que se le asigna un sexo al nacer según sus genitales.
- b. Una persona a la que se le asigna un sexo al nacer según sus genitales y se siente conforme con ese sexo asignado.
- c. Una persona a la que se le asigna un sexo al nacer según sus genitales y no se siente conforme con ese sexo asignado.
- d. Una persona que se realiza una reasignación sexual mediante procedimientos quirúrgicos.

**30. ¿En qué se diferencian los conceptos intersexual y hermafrodita?**

- a. Es lo mismo, antes se llamaba hermafroditas y ahora intersexuales.
- b. La diferencia radica en la falta de genitales de la persona intersexual.
- c. La diferencia radica en que las personas con genitales intersexuales no pueden auto fecundarse.
- d. La diferencia radica en el tamaño de los genitales, según sea de un tamaño menor será intersexual y de un tamaño mayor será considerado hermafroditismo.

**GRACIAS POR TU COLABORACIÓN**

## **KNOWLEDGE QUESTIONNAIRE ABOUT TRANSGENDER (KQaT) (ENGLISH VERSION)**

### **1. To recognize transgender or transsexuality in childhood, families must:**

- a. Resort to a psychiatrist who diagnoses transsexuality
- b. Resort to a psychologist who issues a report
- c. Listen to the child and respect their identity, without censoring
- d. Correct any gender expression (games, clothes, friendships ...) that goes against their sex assigned at birth

### **2. It is understood by sex of registration:**

- a. The one which is established from the physiological characteristics of a person.
- b. The one indicated in the birth certificate as it appears in the civil registry.
- c. The one that the person communicates freely to society
- d. The one which is indicated by a medical certificate.

### **3. In the law in force 3/2007, of March 15, regulating the registration rectification in questions regarding the sex of persons:**

- a. Transgender or transsexuality in minors is not contemplated.
- b. Transsexuality in minors or foreign residents is not contemplated.
- c. Sex change is not allowed without genital surgery
- d. People can request the correction of the registration of sex without any medical requirement.

### **4. The pathologisation of transsexuality carries a series of consequences, such as:**

- a. Human rights violations
- b. Anomalies or malformations
- c. Important limitation of access to public resources
- d. All answers are correct

### **5. Activism for the depathologisation of intersexuality fundamentally seeks**

- a. Defence of the right to body diversity
- b. Defence of the right to gender diversity
- c. Defence of the right to sexual diversity
- d. Defence of the right to cultural diversity

### **6. The principles of Yogyakarta ...**

- a. They enunciate the application of the UN regulations on the rights of transgender people, in the field of Asian and Pacific countries
- b. They are a method of enunciating the rights of intersex people
- c. They are conclusions drawn from the conflict of the Comptom's cafe, the beginning of the revolt for the rights of transsexuals
- d. They are the application of the human rights charter to sexual, bodily and gender diversity

**7. The protocol for the accompaniment of trans students and the attention to gender diversity in the educational centres of the Canary Islands is launched:**

- a. Only if the situation is communicated by the parents or legal representatives of the trans student to the educational centre.
- b. If it is communicated by any member of the educational community.
- c. Exclusively if it is communicated by trans students themselves, to preserve their privacy.
- d. If the Educational Inspection is communicated and it gives the order to apply the protocol.

**8. Once the protocol for the accompaniment of trans students and the attention to gender diversity in the schools of the Canary Islands has been activated, the centre:**

- a. Will allow access to toilets and changing rooms according to their gender identity.
- b. May force students to wear the "school uniform" proposed by the Council School until the student has modified your name in the Civil Registry.
- c. Will obligatorily put the hours of the Physical Education subject at the last hour of the day in courses with trans students.
- d. Will condition a new toilet different from the two existing ones, that can be built adjacent to the main building if necessary, for the exclusive use of trans students.

**9. Within the actions of sensitization, training and curricular adaptation for the inclusion of sexual and gender diversity, educational centres may carry out complementary and / or extracurricular activities; taking advantage of commemorative dates such as:**

- a. March 31: "International Day of Trans Visibility".
- b. May 24: "International Day against Lesbophobia, Homophobia, Transphobia, Biphobia and Interphobia".
- c. June 18: "Lesbian, Gay, Trans, Intersexual, and Non-Binary Identity Pride Day".
- d. October 24: "Intersex Visibility Day".

**10. Hormonal treatment should be initiated:**

- a. Before the development of secondary sexual characteristics
- b. There should always be documented in real-life experience report (according to the protocol)
- c. When the trans person decides to have surgery
- d. They are all false

**11. About the effects of hormonal treatment, it is false that:**

- a. They are mostly reversible
- b. In male to female trans, there is a partial response in facial hair removal
- c. In female to male trans, breast size decreases
- d. The first body modifications usually appear before three months

**12. The adverse effects of hormonal treatment include:**

- a. Venous thromboembolism in case of androgenic hormone therapy
- b. Resistance to the action of insulin with estrogen
- c. With the use of estrogen, breast cancer
- d. With the use of testosterone, moderate to high risk of severe migraine

**13. About surgical reassignment treatment:**

- a. It takes one year of continuous hormonal treatment unless there are medical contraindications for such treatment.

- b. The person should know the different types of intervention, costs, length of hospitalization, possible complications and rehabilitation after surgery
- c. The person must sign the informed consent
- d. All answers are correct

**14. To make a change of the person's name in the Registry, it is necessary:**

- a. The prior existence of a diagnosed personality disorder
- b. Affidavit of the sex claimed by the applicant
- c. The prior existence of sexual reassignment surgery is a necessary condition
- d. The previous existence of a diagnosis of gender dysphoria

**15. Once the change in the registration-name has been made, this will entail:**

- a. The obligation to process a new ID, according to the registration made, with a different ID number.
- b. There is no obligation to process a new ID, just the mere notification
- c. The obligation to process a new ID, keeping the previous number, in accordance with the registration made
- d. The notification from the corresponding Registry, to all organizations, with the new detailed registration

**16. Law 2/2014, of July 8, integral for non-discrimination based on gender identity and recognition of the rights of transsexual persons, is a law applicable to the Autonomous Community of:**

- a. Madrid
- b. Catalonia
- c. Andalusia
- d. It is applicable nationwide

**17. The biological sex is:**

- a. That sex with which one is born and that is determined by the genitals.
- b. The sex of birth and that is determined genetically.
- c. The sex of birth that is given by the genes being man or woman.
- d. The sex of birth that is determined by the genes being male or female.

**18. The feeling of belonging to one gender or another is known as:**

- a. Pansexuality
- b. Transgenerism
- c. Identity.
- d. Homosexuality.

**19. If a person to whom a certain sex was assigned at birth has a feeling of belonging to the other gender. We talk about:**

- a. Pansexuality
- b. Cissexuality
- c. Transvestism.
- d. Transgender or transsexuality

**20. The feeling of belonging to a certain sex is known as:**

- a. Sex felt.
- b. Gender felt.
- c. Belonged sex.



d. Relevant gender

**21. What is the surgery for masculinization of the thorax?**

- a. This surgical procedure is not yet implemented in Spain, it is done in the rest of the European Union.
- b. It is a surgical procedure that is performed on women after suffering from breast cancer, and that results in a male-looking breast.
- c. It is a surgical procedure consisting of a bilateral subcutaneous mastectomy with removal of breast tissue, and reduction of the size of the areolas and nipples according to the male pattern.
- d. It is a surgical procedure that is based on a bilateral subcutaneous mastectomy to reduce breast volume, leaving breast tissue and scar visible and in which most of the time it is not necessary to use an areola-nipple graft.

**22. What do you understand by a trans man?**

- a. A person who has been assigned the male sex at birth and feels female.
- b. A girl who wants to be a boy.
- c. A person who has been assigned the male sex at birth and is operated to be a woman.
- d. A person who has been assigned the female sex at birth and feels male.

**23. The change or adaptation of secondary characters towards felt sex is known as:**

- a. Real life test
- b. Transit.
- c. Transgenerism
- d. Gender expression

**24. When is a child aware of his gender?**

- a. 3-4 years
- b. 5-6 years.
- c. 7-11 years.
- d. 9-14 years.

**25. Indicate the option you consider correct:**

- a. All Autonomous Communities follow a protocol for health care for transgender persons established by the WHO through clinical practice recommendation guides.
- b. Only some communities have health care protocols for trans people, including the Canary Islands.
- c. As it is something of a new emergency in society, there is still no action protocol.
- d. There is only one protocol in the Canary Islands to accompany trans students, in schools.

**26. If a person is born with female biological sex, but identifies with the male gender and is sexually attracted to other women, we talk about:**

- a. A homosexual woman.
- b. A straight woman.
- c. A homosexual man.
- d. A straight man.

**27. Should intersex babies be subjected to surgeries?**

- a. No, never, these procedures are irreversible and result in a body devoid of sexual sensitivity in most cases.
- b. Yes, in the case of necessity and once assessed by paediatric surgery.

- c. It depends on what the parents decide.
- d. It depends on what the doctors and parents think, once the karyotype result arrives.

**28. Is it the same being intersex as being trans?**

- a. Yes, it depends on sexual tastes.
- b. Intersexuality is another form of gender diversity.
- c. Intersexuality is not a part of gender diversity, because intersexuality is not about gender, nor does it have to do with a transition.
- d. Depending on the size of the genitals you are born with; it will be one thing or the other

**29. What do you think a cissexual person is?**

- a. A person who is assigned a sex at birth according to their genitals.
- b. A person who is assigned a sex at birth according to their genitals and feels satisfied with that assigned sex.
- c. A person who is assigned a sex at birth according to their genitals and does not feel satisfied with that assigned sex.
- d. A person who performs a sexual reassignment through surgical procedures.

**30. How do intersex and hermaphrodite concepts differ?**

- a. It is the same, before it was called hermaphrodites and now intersex.
- b. The difference lies in the lack of genitals of the intersexual person.
- c. The difference is that people with intersex genitals cannot self-fertilize.
- d. The difference lies in the size of the genitals, depending on whether it is a smaller size, it will be intersex and a larger size will be considered hermaphroditism.

**THANK YOU FOR YOUR COLLABORATION**
