# Supplementary material for: Impact of a Formative Program on Transgender Healthcare for Nursing Students and Health Professionals. Quasi-Experimental Intervention Study
Source: MDPI journal article supplement (doi:10.3390/ijerph16173205), 2019-09-02
Supplement: s1 [file s1]

# Este proyecto trata de mejorar la atención que prestamos a las personas trans

Para ello pretendemos trabajar en la formación de los nuevos profesionales de forma multidisciplinar.

El acercamiento y el conocimiento a las personas y a la realidad trans reduce barreras y aumenta la calidad de los cuidados en salud que les prestamos a nuestros usuarios.

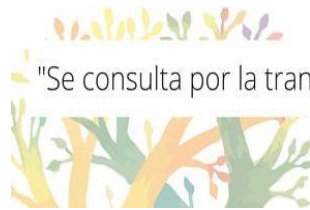

"Se consulta por la transfobia, no por la transexualidad."

Leo Mulió,  
psicólogo y activista trans de la Fundación Daniela,  
hablando de identidades trans en la infancia

"Sexo es lo que se ve, género es lo que se siente. La armonía entre ambos es esencial para la felicidad del ser humano."

Harry Benjamín, 1976

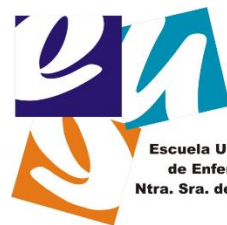

Escuela Universitaria  
de Enfermería  
Ntra. Sra. de Candelaria

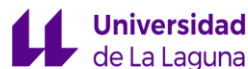

Universidad  
de La Laguna

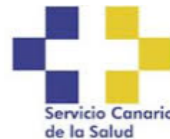

Servicio Canario  
de la Salud

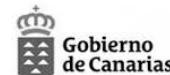

Gobierno  
de Canarias

Colaboran:

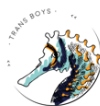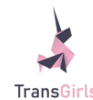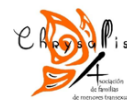

# Atención Trans-competente centrada en la persona

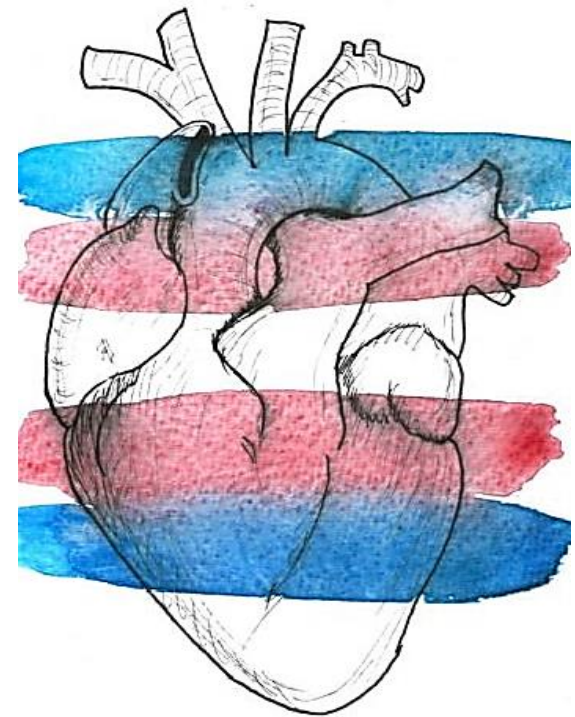

6, 13 y 20 de noviembre  
2018

EUENSC- Practicum

## 6 de Noviembre

- 8:00-8:30h *Presentación y explicación de la actividad*
- 8:30-9:00h *Apertura del Seminario-Taller por parte del Sr. Jesús Delgado Santana, Director Gerente del Hospital Nstra. Sra. de Candelaria*
- 9:00-9:15h *Exploración nivel de conocimientos*
- 9:15-10:30h *Mesa redonda*
- 10:30-11:00h *Descanso*
- 11:00-13:30h *Actividad según grupo*
- 13:30-14:00h *Debate en grupo*

## 13 de Noviembre

- 8:30-10:00h *Mesa redonda*
- 10:00-10:30h *Descanso*
- 10:30-13:00h *Trabajo en grupo*
- 13:00-13:30h *Debate en grupo*

# OMS

El 18 de junio de 2018, saca la TRANSEXUALIDAD de la lista de ENFERMEDADES MENTALES.

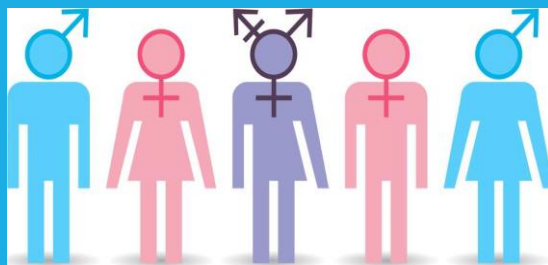

## 20 de Noviembre

- 8:30-10:00h *Trabajo en grupo*
- 10:00-10:15h *Cuestionario de satisfacción con la herramienta*
- 10:15-10:45h *Descanso*
- 10:45-11:30h *Exposición y debate sobre el trabajo realizado*
- 11:30-13:30h *Mesa redonda*
- 13:30-13:45h *Exploración nivel de conocimientos*
- 13:45h *Cierre de la actividad por la Dra. Ana Isabel Jimenez Avizanda, Vicerrectora de Docencia de la ULL.*

### Ponentes invitados

#### Profesionales de:

Enfermería:

Doctorando Jesús M. García Acosta

Antropología

Dra. M. Elisa de Castro Peraza

Psicología

Dra. Lilisbeth Perestelo Pérez

Medicina

Dra. Nieves D. Lorenzo Rocha

Derecho

Sra. Carla Cardona Llabrés

Educación

Doctorando Alfredo Fernández Martínez

#### Asociaciones Colaboradoras:

Transboys: Sr. Eduardo Gestido Castilla

Transgirls: Sra. Yuli Pérez Yumar

Sección Familias Transboys y Transgirls:  
Sra Clara Montesdeoca Castilla

Chrysallis Tenerife: Dra. Olga Díez  
Fernández
